# Supplementary material for: Anti-Inflammatory Effect of Licochalcone A via Regulation of ORAI1 and K+ Channels in T-Lymphocytes
Source: MDPI journal article supplement (doi:10.3390/ijms221910847), 2021-10-07
Supplement: s1 [file s1]

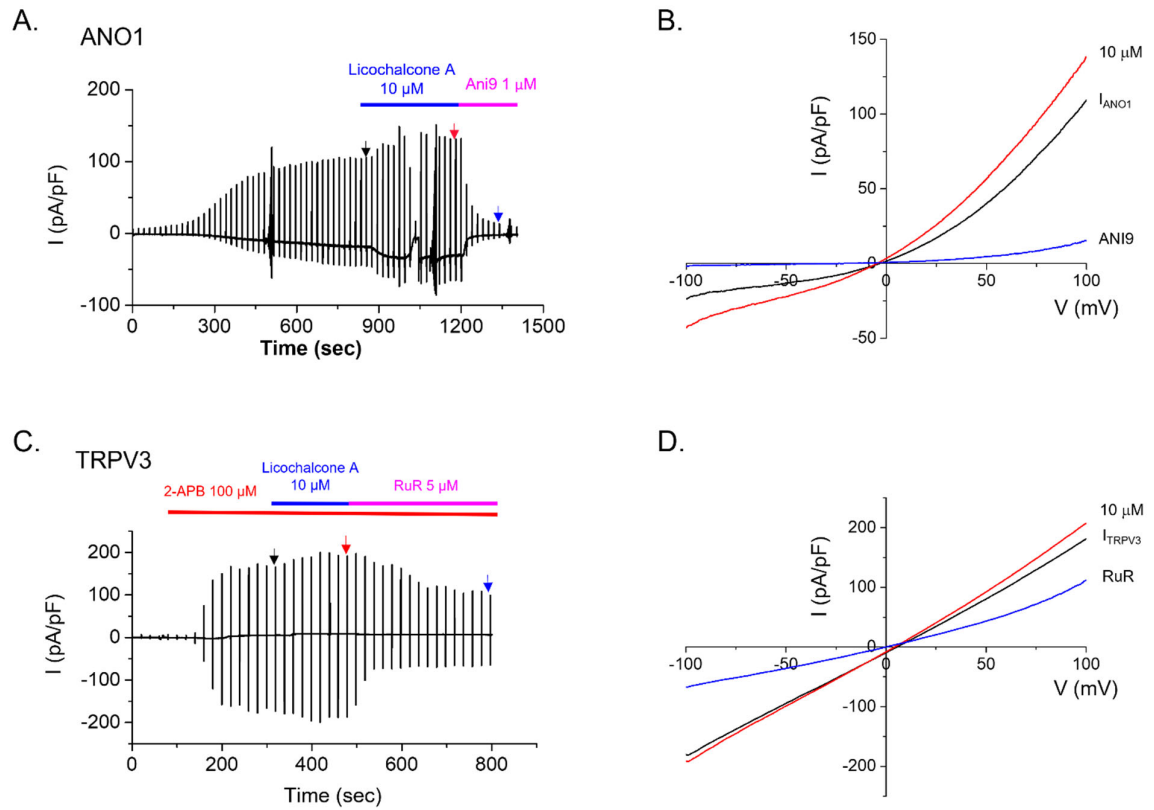

**Figure S1.** The effect of Licochalcone A on TMEM16A and TRPV3 currents in HEK293T cells overexpressing the respective channels. (A, B) Representative induced whole-cell current ( $I_{\text{ANO1}}$ ) trace (A) and its I-V relationships for TMEM16A. (B) No effect of 10  $\mu\text{M}$  licochalcone A was observed on  $I_{\text{ANO1}}$ . (C, D) A typical whole-cell TRPV3 current ( $I_{\text{TRPV3}}$ ) trace activated using 100  $\mu\text{M}$  2-APB (C) and the related I-V curves (D) in the presence of 10  $\mu\text{M}$  licochalcone A. Ani9 and ruthenium red were used as specific inhibitors for ANO1 and TRPV3, respectively.
